# Supplementary material for: Raman Microscopic Analysis of Dry-Surface Biofilms on Clinically Relevant Materials
Source: MDPI journal article supplement (doi:10.3390/microorganisms10071369), 2022-07-07
Supplement: s1 [file s1]

## Supplementary material

Date S1: Exemplary microscopic images for Raman microscopy examined single cells of *Bacillus licheniformis* biofilms on steel coupons. For better visibility of the respective cell, the crosshair was shifted slightly to the left in each case.

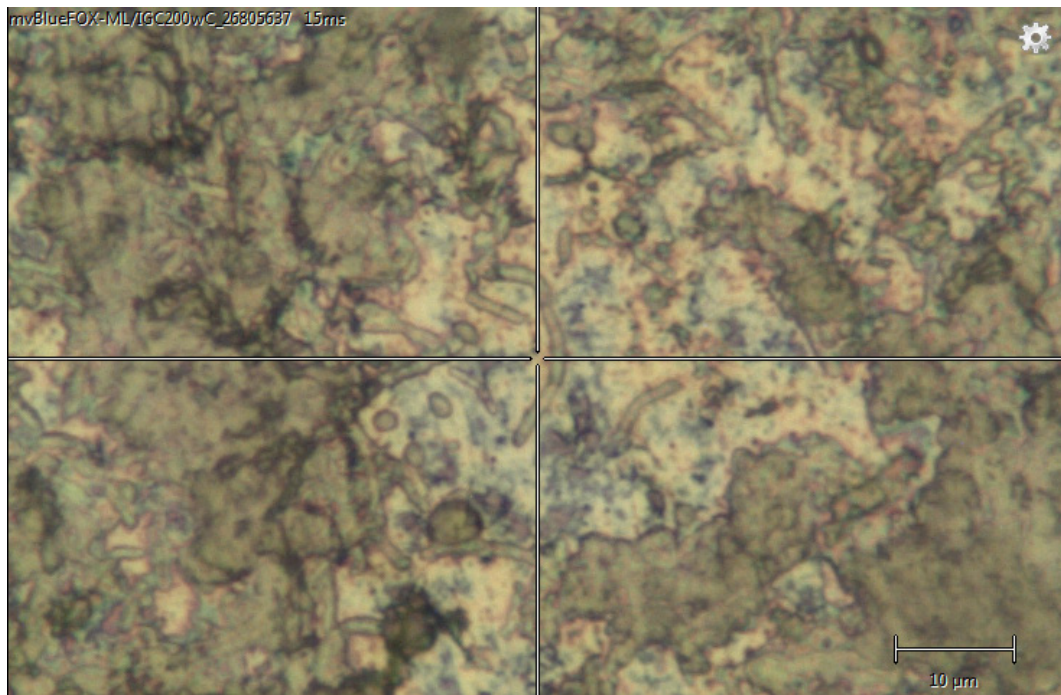

Targeted rod-shaped single cell of *Bacillus licheniformis*.

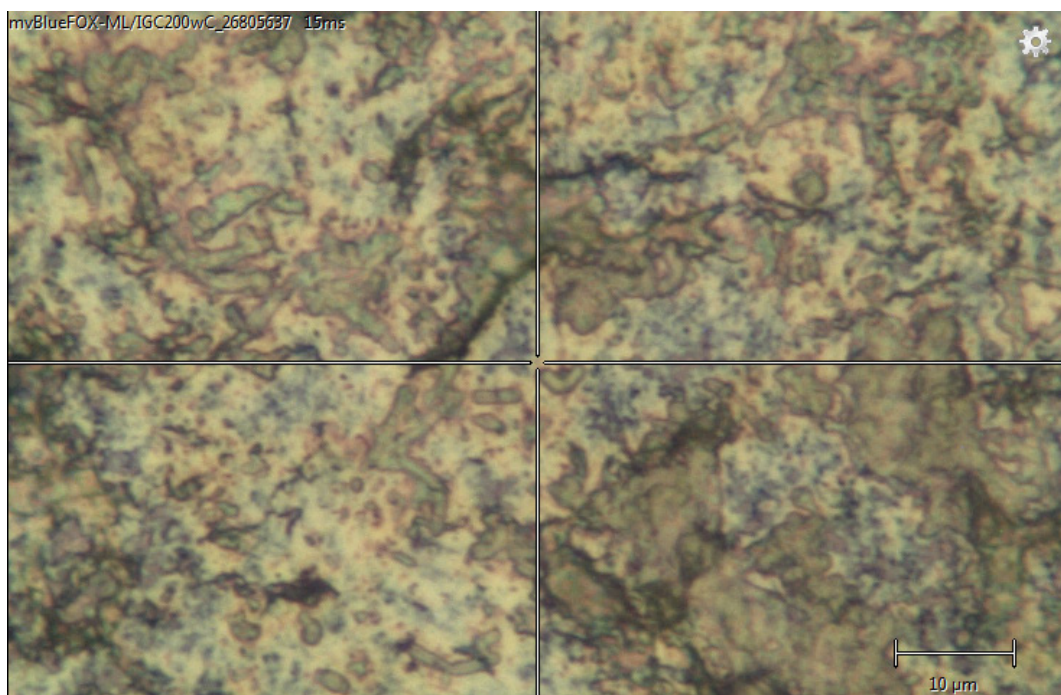

Rod-shaped single cell of *Bacillus licheniformis*.

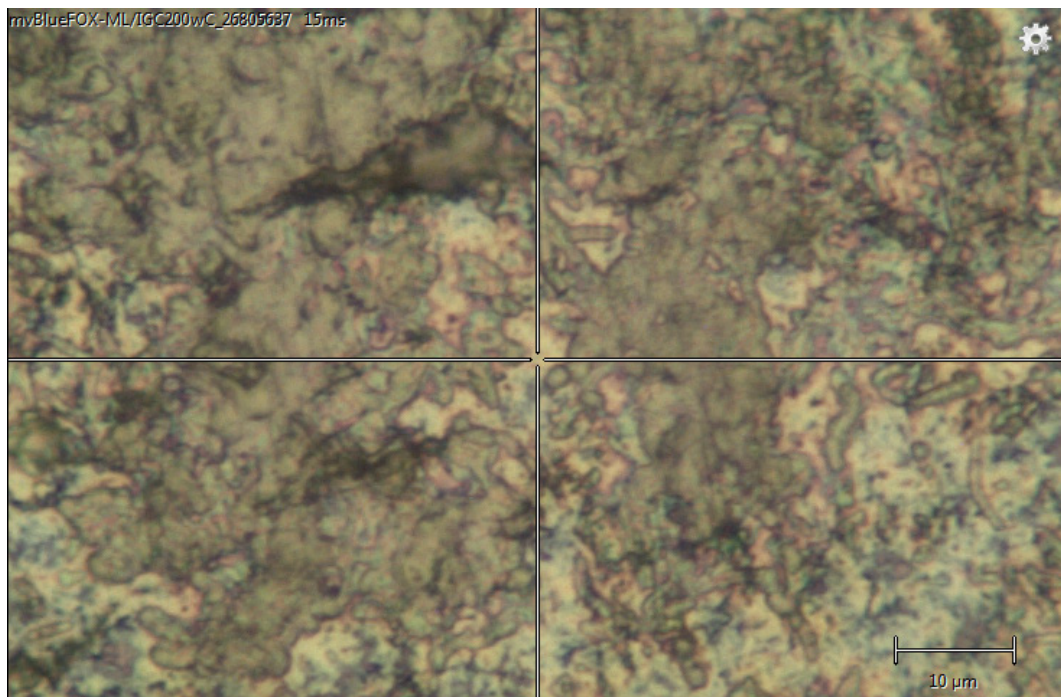

Targeted *Bacillus licheniformis* spore.

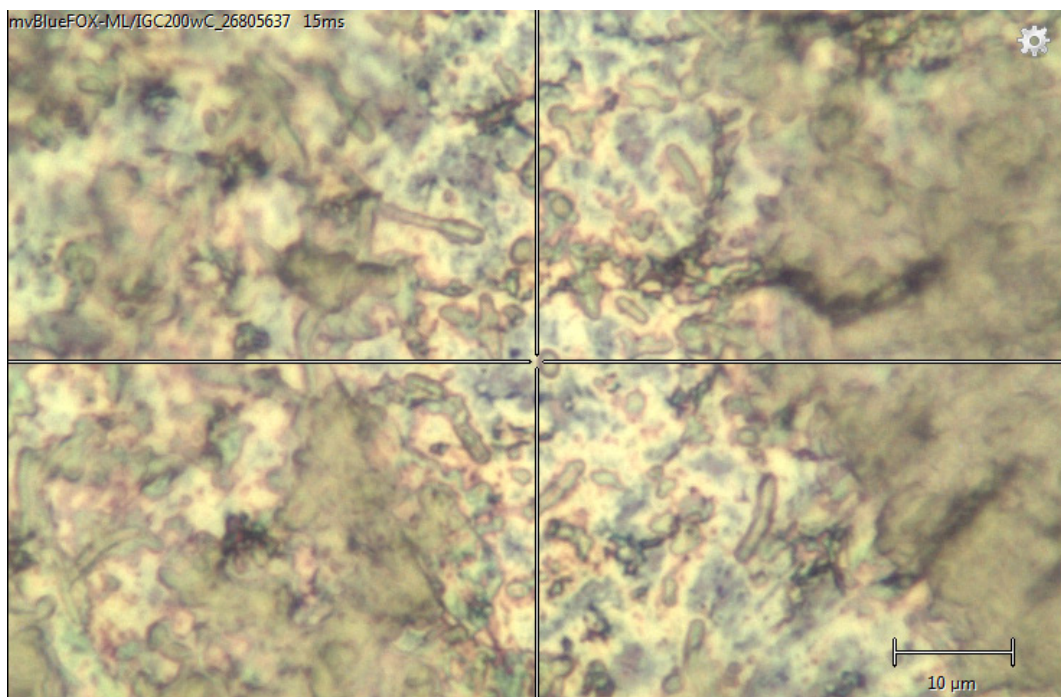

Targeted *Bacillus licheniformis* spore.
