# Supplementary material for: Raman Microscopic Analysis of Dry-Surface Biofilms on Clinically Relevant Materials
Source: MDPI journal article supplement (doi:10.3390/microorganisms10071369), 2022-07-07
Supplement: s1 [file s1]

## Supplementary material

**Data S3: Untreated and treated Raman spectra of data shown in Figure 1 (Raman mappings of *S. aureus* DSB on PVC).**

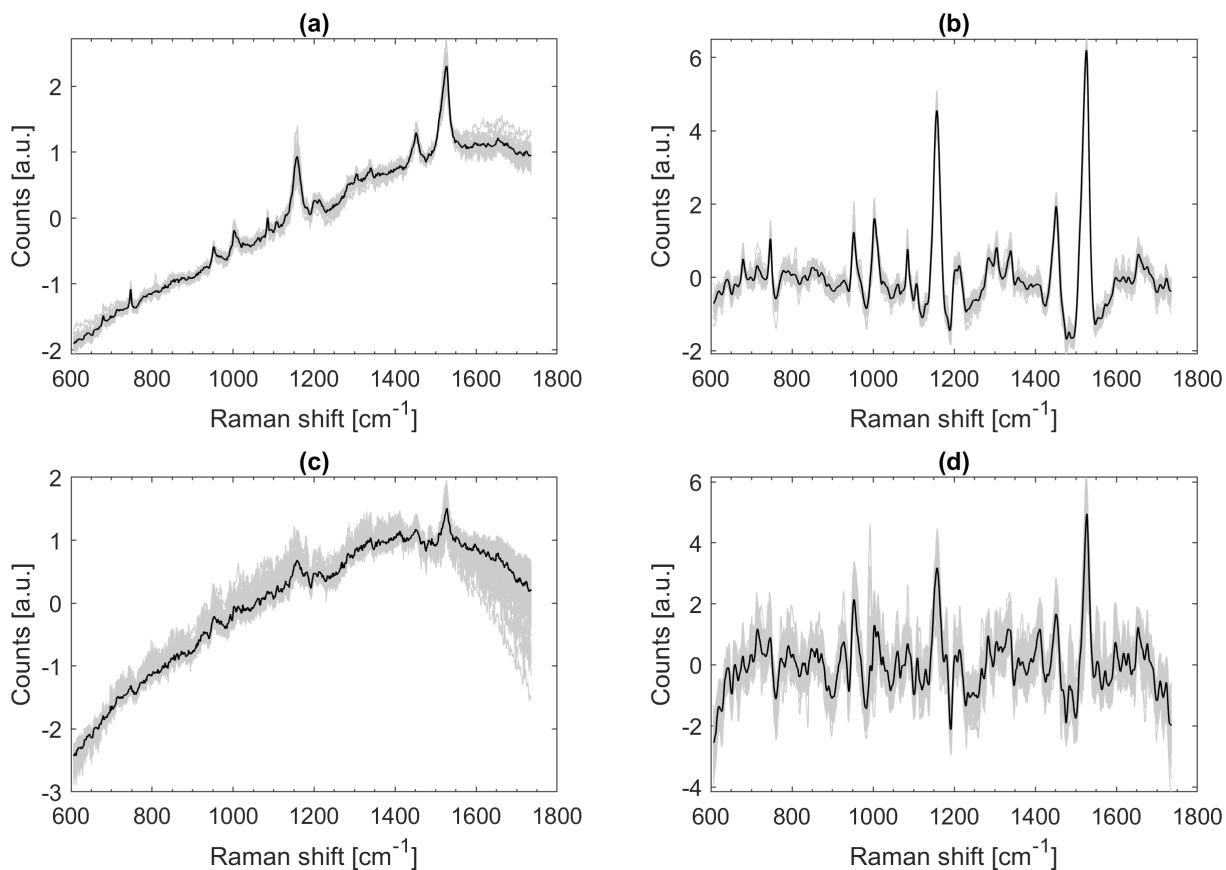

Untreated but normalized data of the smaller Raman map (1400 μm) recorded on PVC **(a)** and the same spectra treated **(b)**. Untreated but normalized data of the larger Raman map (4000 μm) recorded on PVC **(c)** and the same spectra treated **(d)**. The spectra of **(c)** show a stronger fluorescence background than the spectra of **(a)**.
